# Supplementary material
Source: PubMed Central journal article supplement (PMC4630789)
Supplement: NIHMS710838-supplement-2.pdf [file NIHMS710838-supplement-2.pdf]

## SUPPLEMENTARY TABLES

**Table S-1.** Summary of mouse numbers used in each experimental group. Histology at early time points (3 days) was performed only to confirm absence or presence of inflammatory cell infiltration at later time points. For ease of visualization, outcomes performed in the “7-14 days” range are reported together. Macroscopic joint surface photography, histology, and qPCR of individual tissues was performed at 1 week for injured mice, macroscopic joint surface photography for sham was performed at 2 weeks, and qPCR of all whole joints was performed at 12 days. All Taqman single gene qPCR (†) was performed in technical triplicates for each RNA extract.

| Experimental Outcome                                   | Genotype | Treatment(s)     | Naïve           | 3 days | 7-14 days | 28 days |
|--------------------------------------------------------|----------|------------------|-----------------|--------|-----------|---------|
| Macroscopic Joint Surface Photography                  | WT       | Naïve            | 4               | –      | –         | –       |
|                                                        |          | Sham             | –               | –      | 2         | 2       |
|                                                        |          | Injured          | –               | –      | 3         | 3       |
|                                                        | Has1KO   | Naïve or Injured | 4               | –      | 2         | 3       |
| Histology                                              | WT       | Naïve            | 3               | –      | –         | –       |
|                                                        |          | Sham             | –               | –      | 3         | 3       |
|                                                        |          | Injured          | –               | 2      | 4         | 4       |
|                                                        | Has1KO   | Naïve or Injured | 3               | 1      | 2         | 2       |
| Taqman <sup>†</sup> and gene array qPCR (whole joints) | WT       | Naïve            | 3               | –      | –         | –       |
|                                                        |          | Sham             | –               | –      | 3         | 3       |
|                                                        |          | Injured          | –               | 3      | 4         | 4       |
|                                                        | Has1KO   | Naïve or Injured | 3               | 3      | 4         | 4       |
| Taqman <sup>†</sup> qPCR (individual tissues)          | WT       | Naïve            | 12              | –      | –         | –       |
|                                                        |          | Sham             | –               | –      | –         | –       |
|                                                        |          | Injured          | 0               | –      | 12        | 12      |
|                                                        | Has1KO   | Naïve or Injured | 12              | –      | 12        | 12      |
|                                                        | WT       |                  | 22              | 5      | 31        | 31      |
|                                                        | Has1KO   | Subtotals        | 22              | 4      | 20        | 21      |
| TOTAL                                                  |          |                  | <b>156 mice</b> |        |           |         |

**Table S-2.** Inventoried murine Taqman® probes were used for qPCR of cDNA preparations derived from whole joint and pooled individual tissue RNA extracts.

| Gene                                           | Abbreviation   | Inventory Number |
|------------------------------------------------|----------------|------------------|
| Aggrecan                                       | <i>Acan</i>    | Mm00545794_m1    |
| Collagen, type 1, alpha 1                      | <i>Col1a1</i>  | Mm00801666_g1    |
| Collagen, type 2, alpha 1                      | <i>Col2a1</i>  | Mm01309565_m1    |
| Collagen, type 3, alpha 1                      | <i>Col3a1</i>  | Mm00802331_m1    |
| Glyceraldehyde-3-phosphate dehydrogenase *     | <i>Gapdh</i>   | Mm99999915_g1    |
| Hyaluronan synthase 1                          | <i>Has1</i>    | Mm00468496_m1    |
| Hyaluronan synthase 2                          | <i>Has2</i>    | Mm00515089_m1    |
| Hyaluronan synthase 3                          | <i>Has3</i>    | Mm00515092_m1    |
| Inter-alpha trypsin inhibitor, heavy chain 1   | <i>Itih1</i>   | Mm00434529_m1    |
| Inter-alpha trypsin inhibitor, heavy chain 2   | <i>Itih2</i>   | Mm00434529_m1    |
| Tumor necrosis factor, alpha-induced protein 6 | <i>Tnfaip6</i> | Mm00493736_m1    |
| Versican V1 isoform (formerly V0)              | <i>Vcan V1</i> | AI7ZZKW          |
| Versican V2 isoform (formerly V1)              | <i>Vcan V2</i> | Mm00490173_m1    |

\* Housekeeping gene

**Table S-3.** Effect of cartilage injury on mRNA abundance relative to *Gapdh* of ECM and HA network genes in isolated tissue pools from Has1<sup>-/-</sup> mice.

|                    | <i>Acan</i>                | <i>Vcan</i><br>V1 | <i>Vcan</i><br>V2 | <i>Col1a1</i>   | <i>Col2a1</i>  | <i>Col3a1</i>   | <i>Has2</i>    | <i>Tnfaip6</i>  | <i>Itih2</i>   |
|--------------------|----------------------------|-------------------|-------------------|-----------------|----------------|-----------------|----------------|-----------------|----------------|
| <b>Naive</b>       |                            |                   |                   |                 |                |                 |                |                 |                |
| Cartilage/ SC Bone | 10.47                      | 15.00             | ND                | 3317            | 0.85           | 0.95            | ND             | 0.40            | ND             |
| Meniscus/ Synovium | 0.14                       | 19.21             | ND                | 611.1           | ND             | 24.62           | 0.35           | 0.60            | 0.90           |
| Patellar Tendon    | 0.06                       | 6.28              | 0.14              | 2935            | ND             | 2.35            | 0.31           | 3.95            | 0.76           |
| <b>1 week</b>      |                            |                   |                   |                 |                |                 |                |                 |                |
| Cartilage/ SC Bone | 5.25<br>(0.5) <sup>†</sup> | 18.12<br>(1.21)   | 0.11<br>(8.56)    | 3301<br>(1.00)  | 2.10<br>(2.48) | 29.38<br>(31.0) | 0.05<br>(-)    | 1.13<br>(2.85)  | 0.16<br>(-)    |
| Meniscus/ Synovium | 22.35<br>(162)             | 9.57<br>(0.50)    | 4.45<br>(55.1)    | 9042<br>(14.8)  | 0.67<br>(-)    | 4014<br>(9790)  | 1.52<br>(4.41) | 28.59<br>(47.5) | 2.87<br>(3.18) |
| Patellar Tendon    | 14.05<br>(222)             | 9.49<br>(1.51)    | 9.73<br>(70.7)    | 12770<br>(4.35) | 0.23<br>(-)    | 1455<br>(620)   | 2.92<br>(9.36) | 39.83<br>(10.1) | 1.10<br>(1.44) |
| <b>4 weeks</b>     |                            |                   |                   |                 |                |                 |                |                 |                |
| Cartilage/ SC Bone | 7.28<br>(0.69)             | 10.15<br>(0.68)   | 0.19<br>(14.6)    | 5272<br>(1.59)  | 2.61<br>(3.08) | 42.48<br>(44.9) | 0.07<br>(-)    | 2.05<br>(5.16)  | 0.18<br>(-)    |
| Meniscus/ Synovium | 1.48<br>(10.7)             | 2.11<br>(0.11)    | 0.76<br>(9.4)     | 2287<br>(3.74)  | 0.21<br>(-)    | 1084<br>(1210)  | 0.39<br>(1.12) | 32.78<br>(54.5) | 2.17<br>(2.41) |
| Patellar Tendon    | 7.77<br>(123)              | 9.08<br>(1.45)    | 3.41<br>(24.8)    | 8021<br>(2.73)  | 2.31<br>(-)    | 1283<br>(547)   | 1.33<br>(4.27) | 78.12<br>(19.8) | 5.95<br>(7.80) |

<sup>†</sup> Numbers in parentheses are the fold change relative to Naïve. ND = not detected (Ct > 35).

**Table S-4.** Transcript abundance relative to *Gapdh* of NF- $\kappa$ B signaling target genes in naïve WT and Has1<sup>-/-</sup> joints. Increases/decreases by <2(+ / ↓), 2-4(++ / ↓ ↓), 4-8(+++ / ↓ ↓ ↓), 8-16(++++ / ↓ ↓ ↓ ↓), or 16+(+++++ / ↓ ↓ ↓ ↓ ↓) fold, or no change (↔), indicated. Statistical significance between genotypes indicated for p < 0.05 (\*).

| Gene           | WT      | Has1 <sup>-/-</sup> | Fold-Change | Gene            | WT      | Has1 <sup>-/-</sup> | Fold-Change |
|----------------|---------|---------------------|-------------|-----------------|---------|---------------------|-------------|
| <i>Adm</i>     | 1.27    | 2.17                | +           | <i>Il1b</i>     | 301.52  | 396.51              | +           |
| <i>Agt</i>     | 32.22   | 32.55               | ↔           | <i>Il1r2</i>    | 189.56  | 304.87              | +           |
| <i>Akt1</i>    | 235.66  | 270.37              | +           | <i>Il1rn</i>    | 28.90   | 80.62               | ++          |
| <i>Aldh3a2</i> | 120.51  | 118.33              | ↔           | <i>Il2</i>      | 0.70    | 4.08                | +++         |
| <i>Bcl2a1a</i> | 17.72   | 35.41               | ++          | <i>Il2ra</i>    | 5.80    | 23.19               | +++         |
| <i>Bcl2l1</i>  | 314.41  | 449.90              | +           | <i>Il4</i>      | 1.40    | 13.51               | ++++        |
| <i>Birc2</i>   | 109.78  | 111.13              | ↔           | <i>Il6</i>      | 0.93    | 8.76                | ++++ *      |
| <i>Birc3</i>   | 183.43  | 226.19              | +           | <i>Ins2</i>     | 0.51    | 8.99                | +++++       |
| <i>C3</i>      | 764.61  | 805.84              | +           | <i>Irf1</i>     | 174.48  | 243.00              | +           |
| <i>C4a</i>     | 0.84    | 2.51                | ++          | <i>Lta</i>      | 1.04    | 3.13                | ++          |
| <i>Ccl12</i>   | 5.99    | 10.32               | +           | <i>Ltb</i>      | 82.05   | 95.95               | +           |
| <i>Ccl22</i>   | 1.48    | 5.49                | ++          | <i>Map2k6</i>   | 25.88   | 53.50               | ++          |
| <i>Ccl5</i>    | 86.00   | 120.54              | +           | <i>Mitf</i>     | 35.01   | 46.57               | +           |
| <i>Ccnd1</i>   | 84.06   | 138.27              | +           | <i>Mmp9</i>     | 3189.06 | 6580.82             | ++          |
| <i>Ccr5</i>    | 26.15   | 29.93               | +           | <i>Myc</i>      | 146.84  | 444.10              | ++          |
| <i>Cd40</i>    | 22.78   | 41.47               | +           | <i>Myd88</i>    | 19.78   | 28.89               | +           |
| <i>Cd74</i>    | 2833.46 | 2773.61             | ↔           | <i>Ncoa3</i>    | 91.62   | 105.98              | +           |
| <i>Cd80</i>    | 15.53   | 22.51               | +           | <i>Nfkb1</i>    | 230.85  | 527.52              | ++          |
| <i>Cd83</i>    | 100.79  | 108.95              | +           | <i>Nfkb2</i>    | 14.39   | 27.08               | +           |
| <i>Cdkn1a</i>  | 117.97  | 161.72              | +           | <i>Nfkbia</i>   | 474.46  | 1036.87             | ++          |
| <i>Cfb</i>     | 102.95  | 171.40              | +           | <i>Nqo1</i>     | 65.28   | 127.51              | +           |
| <i>Csf1</i>    | 86.34   | 118.65              | +           | <i>Nr4a2</i>    | 12.44   | 27.36               | ++          |
| <i>Csf2</i>    | 0.83    | 1.44                | +           | <i>Pdgfb</i>    | 63.07   | 78.17               | +           |
| <i>Csf2rb</i>  | 39.17   | 158.88              | +++         | <i>Plau</i>     | 33.01   | 49.26               | +           |
| <i>Csf3</i>    | 0.42    | 1.81                | +++         | <i>Ptgs2</i>    | 6.95    | 13.72               | +           |
| <i>Cxcl1</i>   | 1.06    | 4.87                | +++         | <i>Rel</i>      | 109.36  | 193.48              | +           |
| <i>Cxcl10</i>  | 21.07   | 33.87               | +           | <i>Rela</i>     | 148.20  | 176.39              | +           |
| <i>Cxcl3</i>   | 1.13    | 2.38                | ++          | <i>Relb</i>     | 16.45   | 18.39               | +           |
| <i>Cxcl9</i>   | 26.84   | 18.43               | ↓           | <i>Sele</i>     | 30.43   | 51.44               | +           |
| <i>Egfr</i>    | 48.39   | 54.67               | +           | <i>Selp</i>     | 13.09   | 214.54              | +++++       |
| <i>Egr2</i>    | 17.21   | 41.80               | ++          | <i>Snap25</i>   | 0.30    | 3.23                | ++++        |
| <i>F3</i>      | 20.58   | 33.86               | +           | <i>Sod2</i>     | 105.21  | 234.89              | ++          |
| <i>F8</i>      | 22.04   | 40.18               | +           | <i>Stat1</i>    | 219.89  | 450.25              | ++          |
| <i>Fas</i>     | 36.72   | 75.70               | ++          | <i>Stat3</i>    | 87.32   | 232.47              | ++          |
| <i>Fasl</i>    | 5.19    | 10.83               | ++          | <i>Stat5b</i>   | 139.59  | 180.14              | +           |
| <i>Gadd45b</i> | 38.48   | 62.68               | +           | <i>Tnf</i>      | 20.09   | 41.83               | ++          |
| <i>Icam1</i>   | 49.74   | 58.45               | +           | <i>Tnfrsf1b</i> | 86.45   | 139.34              | +           |
| <i>Ifnb1</i>   | 0.84    | 2.75                | ++          | <i>Tnfsf10</i>  | 12.91   | 40.82               | ++          |
| <i>Ifng</i>    | 1.83    | 6.13                | ++          | <i>Traf2</i>    | 20.19   | 79.09               | ++          |
| <i>Il12b</i>   | 1.03    | 1.91                | +           | <i>Trp53</i>    | 180.30  | 327.07              | +           |
| <i>Il15</i>    | 85.41   | 86.20               | ↔           | <i>Vcam1</i>    | 624.77  | 1332.34             | ++          |
| <i>Il1a</i>    | 25.36   | 68.02               | ++          | <i>Xiap</i>     | 149.87  | 225.44              | +           |

**Table S-5.** Transcript abundance relative to *Gapdh* of fibrosis associated genes in naïve WT and Has1<sup>-/-</sup> joints. Increases/decreases by <2(+ / ↓), 2-4(++ / ↓ ↓), 4-8(+++ / ↓ ↓ ↓), 8-16(++++ / ↓ ↓ ↓ ↓), or 16+(+++++ / ↓ ↓ ↓ ↓ ↓) fold, or no change (↔), indicated.

| Gene           | WT       | Has1 <sup>-/-</sup> | Fold-Change | Gene             | WT      | Has1 <sup>-/-</sup> | Fold-Change |
|----------------|----------|---------------------|-------------|------------------|---------|---------------------|-------------|
| <i>Acta2</i>   | 116.83   | 250.47              | ++          | <i>Ltbp1</i>     | 260.88  | 314.38              | +           |
| <i>Bcl2</i>    | 38.67    | 41.69               | +           | <i>Mmp13</i>     | 2682.85 | 2797.68             | ↔           |
| <i>Bmp7</i>    | 11.52    | 9.93                | ↓           | <i>Mmp14</i>     | 156.33  | 281.85              | +           |
| <i>Cav1</i>    | 236.38   | 252.78              | +           | <i>Mmp1a</i>     | 24.89   | 40.96               | +           |
| <i>Ccl11</i>   | 2.99     | 10.38               | ++          | <i>Mmp2</i>      | 515.39  | 467.08              | ↓           |
| <i>Ccl3</i>    | 10.74    | 15.09               | +           | <i>Mmp3</i>      | 2.39    | 19.49               | ++++        |
| <i>Ccr2</i>    | 368.41   | 277.06              | ↓           | <i>Mmp8</i>      | 2006.94 | 2340.96             | +           |
| <i>Cebpb</i>   | 794.67   | 236.62              | ↓↓          | <i>Myc</i>       | 174.55  | 442.91              | ++          |
| <i>Col1a2</i>  | 29633.70 | 22290.13            | ↓           | <i>Pdgfa</i>     | 30.81   | 60.28               | +           |
| <i>Col3a1</i>  | 3473.36  | 4072.74             | +           | <i>Plat</i>      | 13.48   | 32.37               | ++          |
| <i>Ctgf</i>    | 2506.08  | 2645.12             | +           | <i>Plg</i>       | 0.37    | 3.04                | ++++        |
| <i>Cxcr4</i>   | 1627.25  | 1381.88             | ↓           | <i>Serpina1a</i> | 46.07   | 48.59               | +           |
| <i>Dcn</i>     | 8663.40  | 7957.97             | ↓           | <i>Serpine1</i>  | 11.99   | 33.81               | ++          |
| <i>Edn1</i>    | 4.87     | 6.49                | +           | <i>Serpinh1</i>  | 529.54  | 811.48              | +           |
| <i>Egf</i>     | 2.90     | 6.84                | ++          | <i>Smad2</i>     | 104.98  | 193.83              | +           |
| <i>Eng</i>     | 115.12   | 162.05              | +           | <i>Smad3</i>     | 49.65   | 113.82              | ++          |
| <i>Grem1</i>   | 32.08    | 22.44               | ↓           | <i>Smad4</i>     | 184.08  | 374.98              | ++          |
| <i>Hgf</i>     | 44.84    | 33.49               | ↓           | <i>Smad6</i>     | 14.98   | 27.39               | +           |
| <i>Il10</i>    | 0.86     | 3.24                | ++          | <i>Smad7</i>     | 36.53   | 59.39               | +           |
| <i>Il13</i>    | 0.49     | 1.44                | ++          | <i>Snai1</i>     | 6.67    | 8.70                | +           |
| <i>Il13ra2</i> | 8.77     | 11.17               | +           | <i>Sp1</i>       | 289.15  | 445.92              | +           |
| <i>Il5</i>     | 0.72     | 2.86                | ++          | <i>Stat6</i>     | 65.75   | 58.11               | ↓           |
| <i>Ilk</i>     | 568.15   | 1059.02             | +           | <i>Tgfb1</i>     | 443.24  | 1009.28             | ++          |
| <i>Inhbe</i>   | 0.25     | 1.02                | +++         | <i>Tgfb2</i>     | 32.40   | 63.70               | +           |
| <i>Itga1</i>   | 75.42    | 81.47               | +           | <i>Tgfb3</i>     | 13.58   | 68.68               | +++         |
| <i>Itga2</i>   | 45.58    | 79.45               | +           | <i>Tgfbr1</i>    | 113.64  | 188.47              | +           |
| <i>Itga3</i>   | 4.33     | 7.26                | +           | <i>Tgfbr2</i>    | 207.87  | 457.03              | ++          |
| <i>Itgav</i>   | 314.73   | 356.95              | +           | <i>Tgif1</i>     | 14.57   | 36.93               | ++          |
| <i>Itgb1</i>   | 791.67   | 1108.95             | +           | <i>Thbs1</i>     | 1180.99 | 1945.09             | +           |
| <i>Itgb3</i>   | 377.41   | 703.07              | +           | <i>Thbs2</i>     | 172.87  | 347.49              | ++          |
| <i>Itgb5</i>   | 143.77   | 227.04              | +           | <i>Timp1</i>     | 2.24    | 21.31               | ++++        |
| <i>Itgb6</i>   | 8.88     | 9.53                | +           | <i>Timp2</i>     | 558.94  | 1291.67             | ++          |
| <i>Itgb8</i>   | 4.00     | 12.50               | ++          | <i>Timp3</i>     | 225.90  | 545.54              | ++          |
| <i>Jun</i>     | 76.34    | 89.11               | +           | <i>Timp4</i>     | 34.12   | 88.27               | ++          |
| <i>Lox</i>     | 325.68   | 393.80              | +           | <i>Vegfa</i>     | 62.32   | 162.22              | ++          |

**Table S-6.** Fold-change in expression of NF- $\kappa$ B signaling target genes in WT and Has1<sup>-/-</sup> joints at 12 and 28 d post injury. Values shown are relative to naïve levels for the respective genotype. Significance between genotypes at each post-injury time point (\*) are indicated for p< 0.05.

| Gene           | WT 12d | WT 28d | Has1 <sup>-/-</sup> 12d | Has1 <sup>-/-</sup> 28d | Gene            | WT 12d | WT 28d | Has1 <sup>-/-</sup> 12d | Has1 <sup>-/-</sup> 28d |
|----------------|--------|--------|-------------------------|-------------------------|-----------------|--------|--------|-------------------------|-------------------------|
| <i>Adm</i>     | 1.61   | -1.79  | 3.78                    | 1.04                    | <i>Il1b</i>     | -1.82  | -1.31  | 1.01                    | -1.23                   |
| <i>Agt</i>     | -2.08  | -1.91  | -1.25                   | -1.85                   | <i>Il1r2</i>    | -2.95  | 1.03   | 1.54                    | -1.14                   |
| <i>Akt1</i>    | -1.10  | -1.41  | 2.00                    | -1.99                   | <i>Il1rn</i>    | -1.91  | -1.02  | -1.77                   | 1.05                    |
| <i>Aldh3a2</i> | -1.32  | -1.51  | 1.30                    | -1.66                   | <i>Il2</i>      | -6.42  | -3.31  | -5.20 *                 | -6.62                   |
| <i>Bcl2a1a</i> | -1.68  | -1.23  | -1.14                   | -2.19                   | <i>Il2ra</i>    | -1.53  | 1.06   | -2.10                   | -3.24                   |
| <i>Bcl2l1</i>  | -2.12  | -1.21  | 1.49                    | -2.34                   | <i>Il4</i>      | -2.54  | -1.86  | -6.32                   | -1.40                   |
| <i>Birc2</i>   | -1.43  | -1.61  | 1.95                    | -1.66                   | <i>Il6</i>      | 4.73   | 1.77   | 1.40                    | 1.13                    |
| <i>Birc3</i>   | -1.57  | -1.26  | 2.18                    | -1.61                   | <i>Ins2</i>     | -7.21  | -3.26  | -20.69 *                | -10.94                  |
| <i>C3</i>      | -1.23  | -1.61  | 1.47                    | -1.95                   | <i>Irf1</i>     | -1.49  | -1.14  | 1.09                    | -1.57                   |
| <i>C4a</i>     | -4.24  | -1.98  | 1.82                    | -3.19                   | <i>Lta</i>      | -2.80  | -1.67  | -1.17                   | -3.04                   |
| <i>Ccl12</i>   | 2.15   | 2.07   | 4.43                    | 1.41                    | <i>Ltb</i>      | -1.86  | -1.48  | -1.77                   | -1.64                   |
| <i>Ccl22</i>   | 1.19   | -2.96  | -1.66                   | -2.10                   | <i>Map2k6</i>   | -1.05  | -1.43  | 1.02                    | -1.36                   |
| <i>Ccl5</i>    | -1.62  | -1.06  | 1.04                    | -1.42                   | <i>Mif</i>      | 1.01   | -1.33  | 1.65                    | 1.12                    |
| <i>Ccnd1</i>   | -1.06  | -1.53  | 1.64                    | -1.43                   | <i>Mmp9</i>     | -1.61  | 1.06   | -1.02                   | -1.53                   |
| <i>Ccr5</i>    | 1.69   | -1.33  | 1.66                    | 1.07                    | <i>Myc</i>      | -1.54  | 1.29   | -1.20                   | -1.73                   |
| <i>Cd40</i>    | -1.58  | -1.16  | 1.42                    | -2.25                   | <i>Myd88</i>    | -1.12  | -2.19  | 1.04                    | -1.07                   |
| <i>Cd74</i>    | -1.38  | -1.23  | 1.07                    | -1.99                   | <i>Ncoa3</i>    | 1.04   | -1.55  | 1.69                    | -2.18                   |
| <i>Cd80</i>    | -1.05  | -1.40  | 2.22                    | -1.34                   | <i>Nfkb1</i>    | -1.01  | -1.30  | -1.21                   | -1.30                   |
| <i>Cd83</i>    | -1.95  | -1.23  | 1.95                    | -1.92                   | <i>Nfkb2</i>    | 1.10   | -1.10  | 2.00                    | -1.12                   |
| <i>Cdkn1a</i>  | 1.35   | -1.27  | 3.44                    | -1.35                   | <i>Nfkbia</i>   | -1.37  | 1.06   | -1.26                   | 1.04                    |
| <i>Cfb</i>     | 1.72   | -1.43  | 2.59                    | -1.83                   | <i>Nqo1</i>     | -1.57  | -1.01  | -1.52                   | -1.58                   |
| <i>Csf1</i>    | -1.16  | -1.20  | 1.60                    | -1.81                   | <i>Nr4a2</i>    | 5.08   | 1.23   | 5.59                    | 2.32                    |
| <i>Csf2</i>    | -7.29  | -2.44  | 1.36 *                  | -1.82                   | <i>Pdgfb</i>    | 1.02   | -1.47  | 1.33                    | -1.39                   |
| <i>Csf2rb</i>  | 2.31   | 2.16   | 1.20                    | -1.47                   | <i>Plau</i>     | 1.54   | -1.09  | 1.24                    | -1.17                   |
| <i>Csf3</i>    | -2.16  | -1.16  | 1.53                    | -4.85                   | <i>Ptgs2</i>    | 4.35   | -1.20  | 3.09                    | 2.33                    |
| <i>Cxcl1</i>   | 3.37   | -1.01  | 2.60                    | 1.89                    | <i>Rel</i>      | -1.62  | -1.29  | -2.14                   | -1.43                   |
| <i>Cxcl10</i>  | 1.19   | -1.23  | 1.33                    | -2.16                   | <i>Rela</i>     | -1.08  | -1.05  | 1.82                    | -1.49                   |
| <i>Cxcl3</i>   | 1.19   | -2.28  | 2.42                    | 1.19                    | <i>Relb</i>     | 1.11   | -1.12  | 2.47                    | -1.13                   |
| <i>Cxcl9</i>   | -1.20  | -1.21  | 1.55                    | -2.46                   | <i>Sele</i>     | -1.26  | -1.06  | -1.14                   | -1.39                   |
| <i>Egfr</i>    | 2.24   | -1.27  | 4.04                    | -1.14                   | <i>Selp</i>     | 5.67   | 6.72   | -2.28                   | -1.03                   |
| <i>Egr2</i>    | 1.36   | 1.17   | 1.69                    | -1.61                   | <i>Snap25</i>   | -1.98  | -1.82  | -3.78                   | -6.28                   |
| <i>F3</i>      | 1.08   | -1.28  | 2.37                    | -1.50                   | <i>Sod2</i>     | 1.02   | -1.03  | -1.23                   | 1.52                    |
| <i>F8</i>      | -2.33  | -1.40  | -1.29                   | -1.90                   | <i>Stat1</i>    | -1.21  | -1.01  | -1.84                   | -1.53                   |
| <i>Fas</i>     | -1.32  | -1.12  | 1.25                    | -1.50                   | <i>Stat3</i>    | 1.47   | -1.47  | -1.43                   | -1.11                   |
| <i>Fasl</i>    | -2.53  | -1.20  | -1.20                   | -1.96                   | <i>Stat5b</i>   | -1.39  | 1.09   | 1.98                    | 1.34                    |
| <i>Gadd45b</i> | 1.31   | -1.61  | 1.89                    | -1.43                   | <i>Tnf</i>      | -1.46  | -1.31  | -2.18                   | -1.68                   |
| <i>Icam1</i>   | 1.00   | -1.56  | 1.91                    | 1.05                    | <i>Tnfrsf1b</i> | -1.11  | -1.30  | -1.70                   | -1.40                   |
| <i>Ifnb1</i>   | -9.15  | -2.90  | -1.59                   | -4.66                   | <i>Tnfrsf10</i> | 1.16   | -1.31  | -1.97                   | -1.23                   |
| <i>Ifng</i>    | -1.59  | -2.63  | -1.97                   | -3.74                   | <i>Traf2</i>    | -1.12  | -1.18  | -2.09                   | -1.61                   |
| <i>Il12b</i>   | 1.02   | -1.96  | 1.33                    | -3.09                   | <i>Trp53</i>    | -1.23  | -1.05  | -1.61                   | -1.58                   |
| <i>Il15</i>    | -2.03  | -1.51  | 1.17                    | -1.33                   | <i>Vcam1</i>    | -2.12  | 1.42   | -2.21                   | -1.57                   |
| <i>Il1a</i>    | -2.24  | -1.04  | -1.81                   | -2.01                   | <i>Xiap</i>     | -1.22  | -1.05  | -1.29                   | -1.15                   |

**Table S-7.** Fold-change in expression of fibrosis genes in injured WT and Has1<sup>-/-</sup> joints at 12 and 28 d post injury. Values shown are relative to naïve levels for the respective genotype. Significance between injured and naïve within the genotype (#) and between genotypes at each post-injury time point (\*) and are indicated for p< 0.05.

| Gene           | WT<br>12d | WT<br>28d | Has1 <sup>-/-</sup><br>12d | Has1 <sup>-/-</sup><br>28d | Gene             | WT<br>12d | WT<br>28d | Has1 <sup>-/-</sup><br>12d | Has1 <sup>-/-</sup><br>28d |
|----------------|-----------|-----------|----------------------------|----------------------------|------------------|-----------|-----------|----------------------------|----------------------------|
| <i>Acta2</i>   | 1.67      | 1.25      | 1.55                       | -1.12                      | <i>Ltbp1</i>     | 1.08      | -1.52     | 1.23                       | 1.02                       |
| <i>Bcl2</i>    | -2.80     | -2.43     | -1.45                      | -1.85                      | <i>Mmp13</i>     | -2.63     | -1.57     | -1.43                      | -1.34                      |
| <i>Bmp7</i>    | -4.16     | -2.28     | -1.33                      | -1.36                      | <i>Mmp14</i>     | 1.68      | -1.19     | 1.19                       | -1.23                      |
| <i>Cav1</i>    | -1.57     | -2.71     | 1.84                       | -1.07                      | <i>Mmp1a</i>     | -9.71     | -16.73    | -8.49                      | 1.18                       |
| <i>Ccl11</i>   | 1.35      | 1.75      | -3.56                      | -1.36                      | <i>Mmp2</i>      | 2.58      | 1.13      | 5.95 #                     | 2.21                       |
| <i>Ccl3</i>    | -4.16     | -1.48     | -2.34 *                    | -1.70                      | <i>Mmp3</i>      | 43.24     | 18.79     | 11.8 #                     | 11.6 #                     |
| <i>Ccr2</i>    | -3.59     | -1.60     | -3.16                      | -1.21                      | <i>Mmp8</i>      | -3.37     | -1.48     | -2.91                      | -1.33                      |
| <i>Cebpb</i>   | -7.47     | -1.33     | 2.61                       | 1.17                       | <i>Myc</i>       | -1.81     | -1.23     | -2.95                      | -2.36                      |
| <i>Col1a2</i>  | -2.04     | -1.16     | 2.40 *                     | 1.36                       | <i>Pdgfa</i>     | 1.01      | -1.28     | -1.10                      | -1.22                      |
| <i>Col3a1</i>  | 4.49      | 2.24      | 12.3 #                     | 4.76                       | <i>Plat</i>      | 2.76      | -1.52     | 1.34                       | 1.60                       |
| <i>Ctgf</i>    | -2.43     | -1.16     | 2.24 *                     | -1.06                      | <i>Plg</i>       | -1.81     | -1.26     | -7.20                      | -5.15                      |
| <i>Cxcr4</i>   | -3.94     | -2.09     | -3.22                      | -1.78                      | <i>Serpina1a</i> | -3.42     | -2.67     | -2.90                      | -2.66                      |
| <i>Dcn</i>     | -1.45     | -1.20     | 1.83                       | 1.44                       | <i>Serpine1</i>  | 2.47      | 1.29      | 1.64                       | 2.00                       |
| <i>Edn1</i>    | -1.18     | -1.62     | 1.77                       | 1.19                       | <i>Serpinh1</i>  | 1.65      | -1.12     | 2.03                       | 1.09                       |
| <i>Egf</i>     | -1.40     | -1.82     | -1.91                      | -3.49                      | <i>Smad2</i>     | -1.87     | -1.44     | -1.58                      | -1.30                      |
| <i>Eng</i>     | -1.80     | -1.79     | -1.58                      | -1.88                      | <i>Smad3</i>     | 1.22      | -1.58     | -1.37                      | -1.70                      |
| <i>Grem1</i>   | -8.02     | -2.56     | -2.50 *                    | -1.95                      | <i>Smad4</i>     | -1.05     | -1.43     | -1.77                      | -1.53                      |
| <i>Hgf</i>     | -3.00     | -1.32     | -1.60                      | -1.52                      | <i>Smad6</i>     | -1.16     | -1.43     | 1.25                       | -1.57                      |
| <i>Il10</i>    | -1.98     | 1.34      | -1.46                      | -1.71                      | <i>Smad7</i>     | -1.17     | -1.45     | -1.05                      | -2.30                      |
| <i>Il13</i>    | -5.97     | -1.58     | -1.94                      | -2.15                      | <i>Snai1</i>     | 1.36      | -1.26     | 2.36                       | -1.29                      |
| <i>Il13ra2</i> | -4.05     | -1.52     | -1.84                      | 1.17                       | <i>Sp1</i>       | -1.44     | -1.49     | -1.54                      | -1.68                      |
| <i>Il5</i>     | -1.90     | -1.74     | -2.72                      | -2.18                      | <i>Stat6</i>     | -1.04     | -1.33     | 1.42                       | -2.35                      |
| <i>Ilk</i>     | -2.49     | -1.49     | -2.99                      | -1.66                      | <i>Tgfb1</i>     | -1.25     | -1.40     | -2.55                      | -1.76                      |
| <i>Inhbe</i>   | -1.43     | 1.48      | -1.27                      | -2.01                      | <i>Tgfb2</i>     | 2.09      | -1.99     | 1.33                       | -1.18                      |
| <i>Itga1</i>   | -2.86     | -1.68     | -1.99                      | -1.43                      | <i>Tgfb3</i>     | 7.41      | 1.92      | 2.27                       | 1.20                       |
| <i>Itga2</i>   | -2.75     | -1.66     | -3.43                      | -1.67                      | <i>Tgfb1</i>     | -1.04     | -1.31     | -1.23                      | -1.32                      |
| <i>Itga3</i>   | -2.06     | -1.69     | -2.34                      | -1.27                      | <i>Tgfb2</i>     | 1.65      | -1.59     | -1.07                      | -1.63                      |
| <i>Itgav</i>   | -3.39     | -1.39     | -1.62                      | -1.46                      | <i>Tgif1</i>     | 1.40      | -1.62     | -1.92                      | -1.28                      |
| <i>Itgb1</i>   | -1.20     | -1.44     | 1.16                       | -1.08                      | <i>Thbs1</i>     | 1.28      | -1.23     | 1.00                       | -1.30                      |
| <i>Itgb3</i>   | -1.76     | 1.20      | -1.88                      | -1.91                      | <i>Thbs2</i>     | 7.41      | 1.08      | 4.77                       | 1.99                       |
| <i>Itgb5</i>   | 1.38      | -1.39     | 1.07                       | -1.36                      | <i>Timp1</i>     | 1.53      | 1.19      | -2.85                      | 3.69                       |
| <i>Itgb6</i>   | 1.21      | -2.75     | 1.26                       | -1.29                      | <i>Timp2</i>     | 3.05      | -1.02     | 2.23                       | 1.28                       |
| <i>Itgb8</i>   | 1.42      | -1.47     | -2.00                      | -1.49                      | <i>Timp3</i>     | 1.14      | -1.30     | -1.43                      | -1.26                      |
| <i>Jun</i>     | 1.13      | -1.25     | 1.20                       | 1.04                       | <i>Timp4</i>     | -4.08     | -2.67     | -4.42                      | -2.77                      |
| <i>Lox</i>     | 1.24      | -1.58     | 1.23                       | 1.12                       | <i>Vegfa</i>     | 1.05      | -2.04     | -1.36                      | -1.48                      |
